# Supplementary material
Source: Springer Nature journal article supplement (https://www.springermedizin.de/resource/supplementary/12899_2003_48_MOESM1_ESM.pdf/9514796)

### NT group

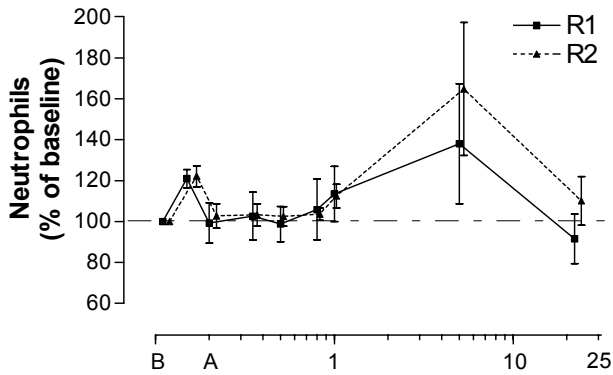

### HT group

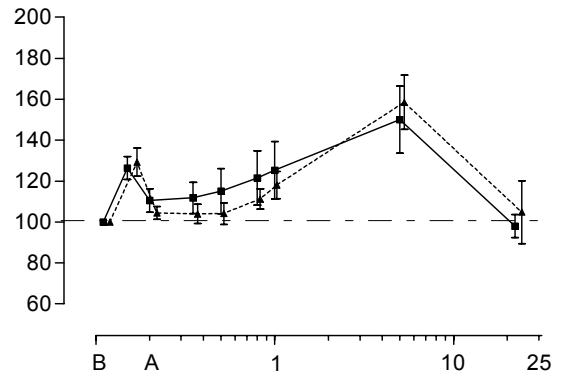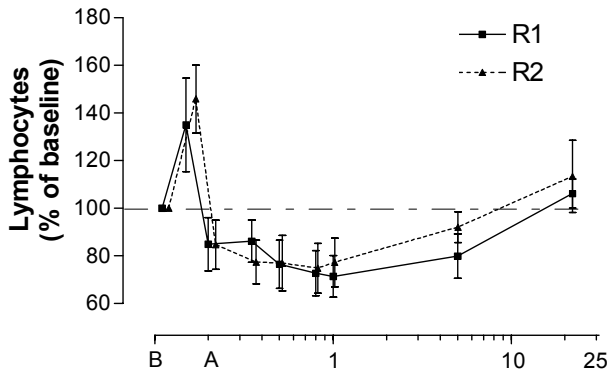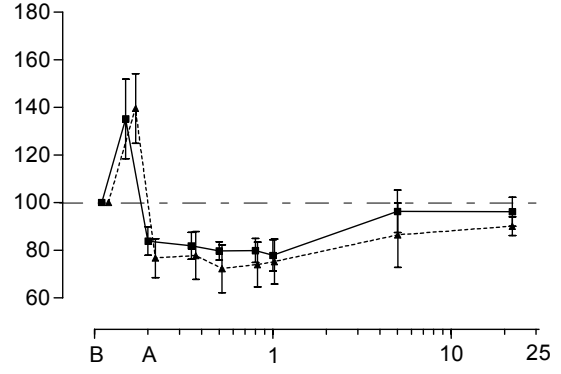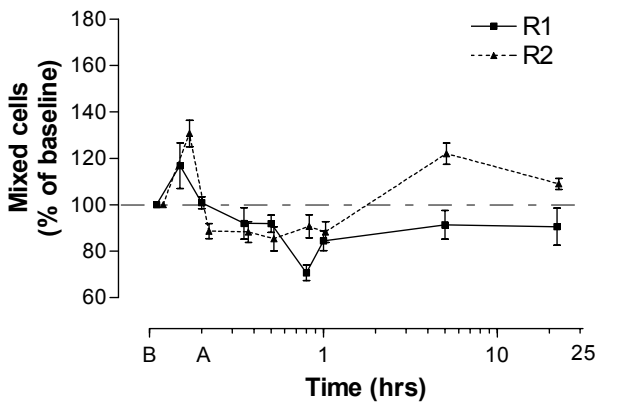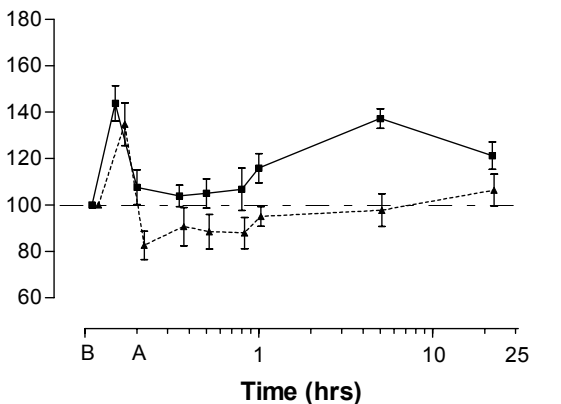

Supplement: MOESM1 [file 9514796]
